# Supplementary material for: Little Italy: An Agent-Based Approach to the Estimation of Contact Patterns- Fitting Predicted Matrices to Serological Data
Source: PubMed Central journal article supplement (PMC2996317; doi:10.1371/journal.pcbi.1001021), 2010-12-02

## Little-Italy: an agent-based approach to the estimation of contact patterns. Fitting predicted matrices to serological data.

Fabrizio Iozzi, Francesco Trusiano, Matteo Chinazzi, Francesco Billari, Emilio Zagheni, Stefano Merler, Marco Ajelli, Emanuele Del Fava, Piero Manfredi

### Supporting Text S4. Little Italy activity-specific Type 1 matrices.

- We report contour plots of Little Italy Type 1 activity-specific matrices. These matrices are computed for the five Little-Italy principal activities:
  - Household
  - School
  - Work
  - “Other” activities (termed “commercial workplaces”)
  - Transport
- The matrices entries represent total time spent in contacts between individuals aged  $i$  and  $j$  for each single year of age. These matrices are by definition symmetric. The total contacts Little Italy Type 1 matrix  $K_{ij}$  used in the paper is obtained by summing the five activity specific matrices.

House Contacts

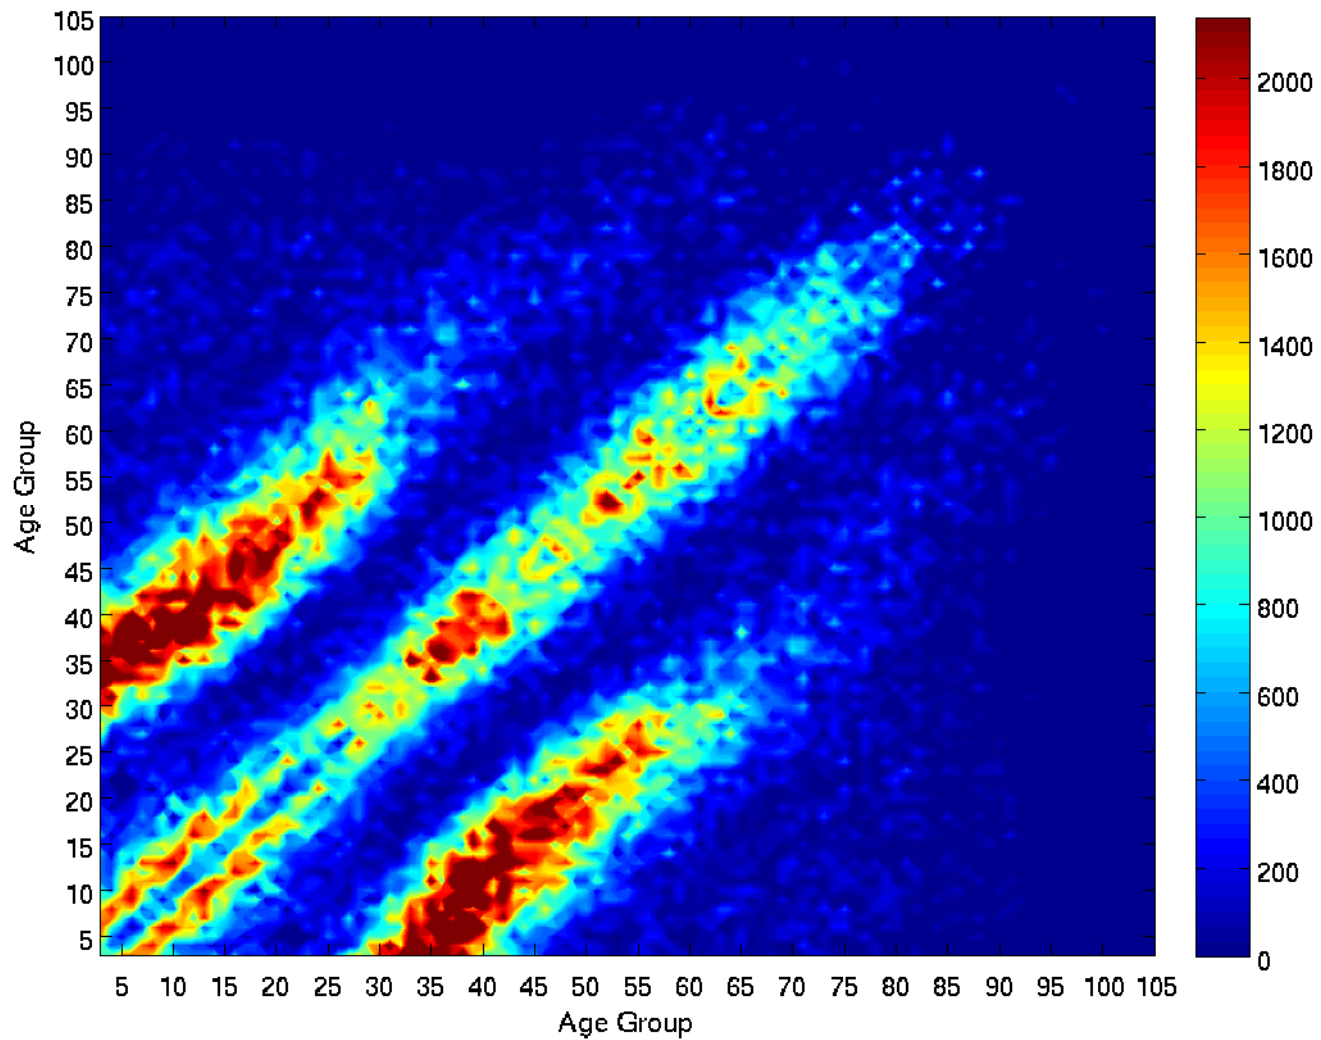

School Contacts

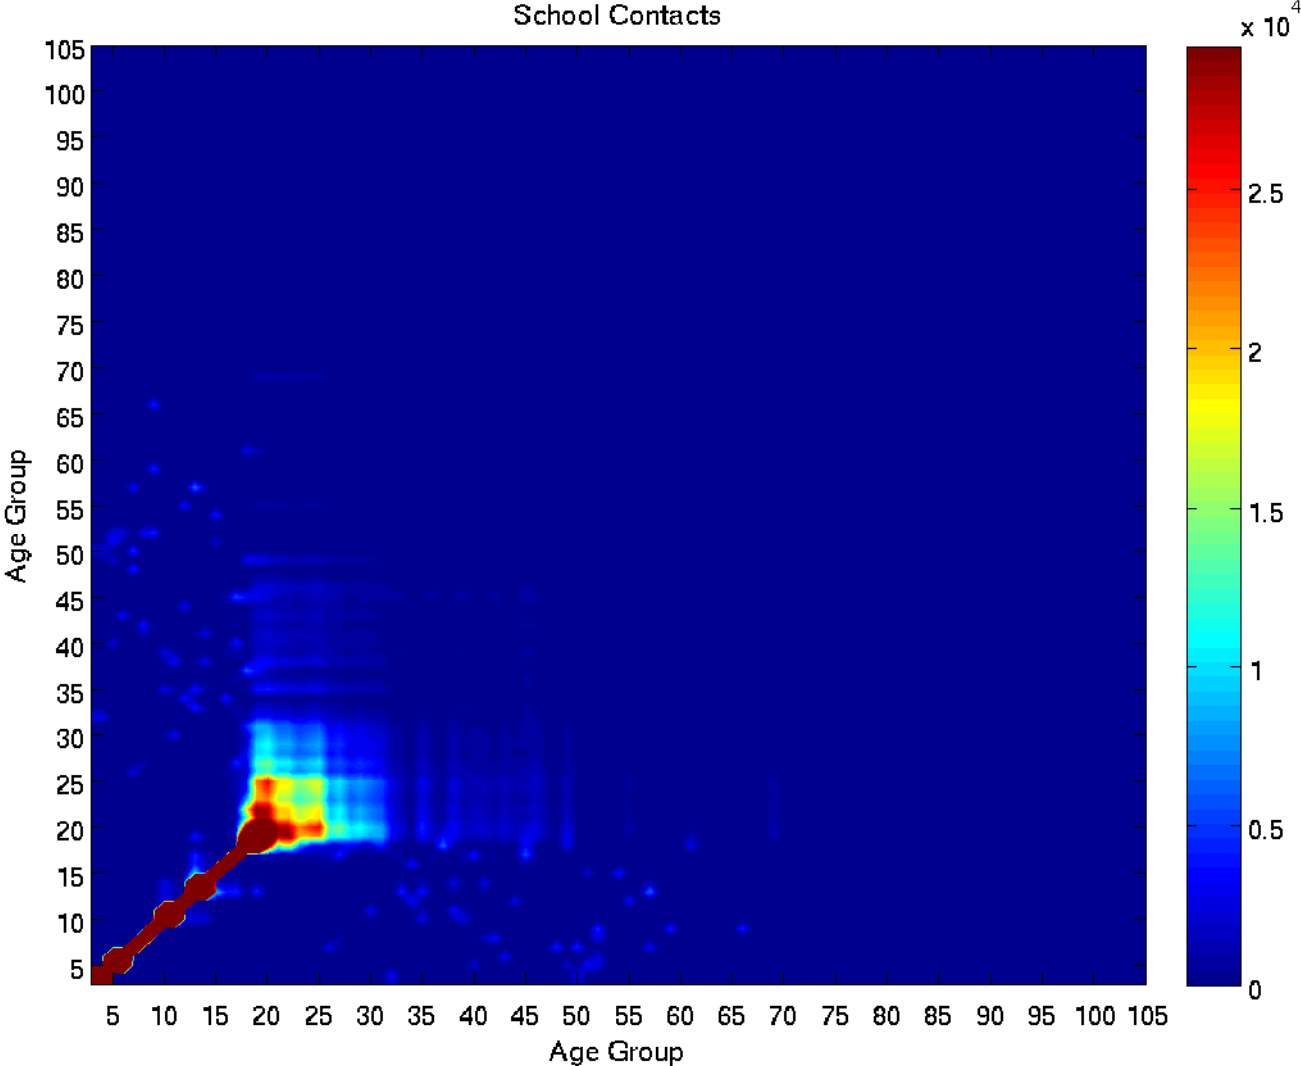





Transport Contacts

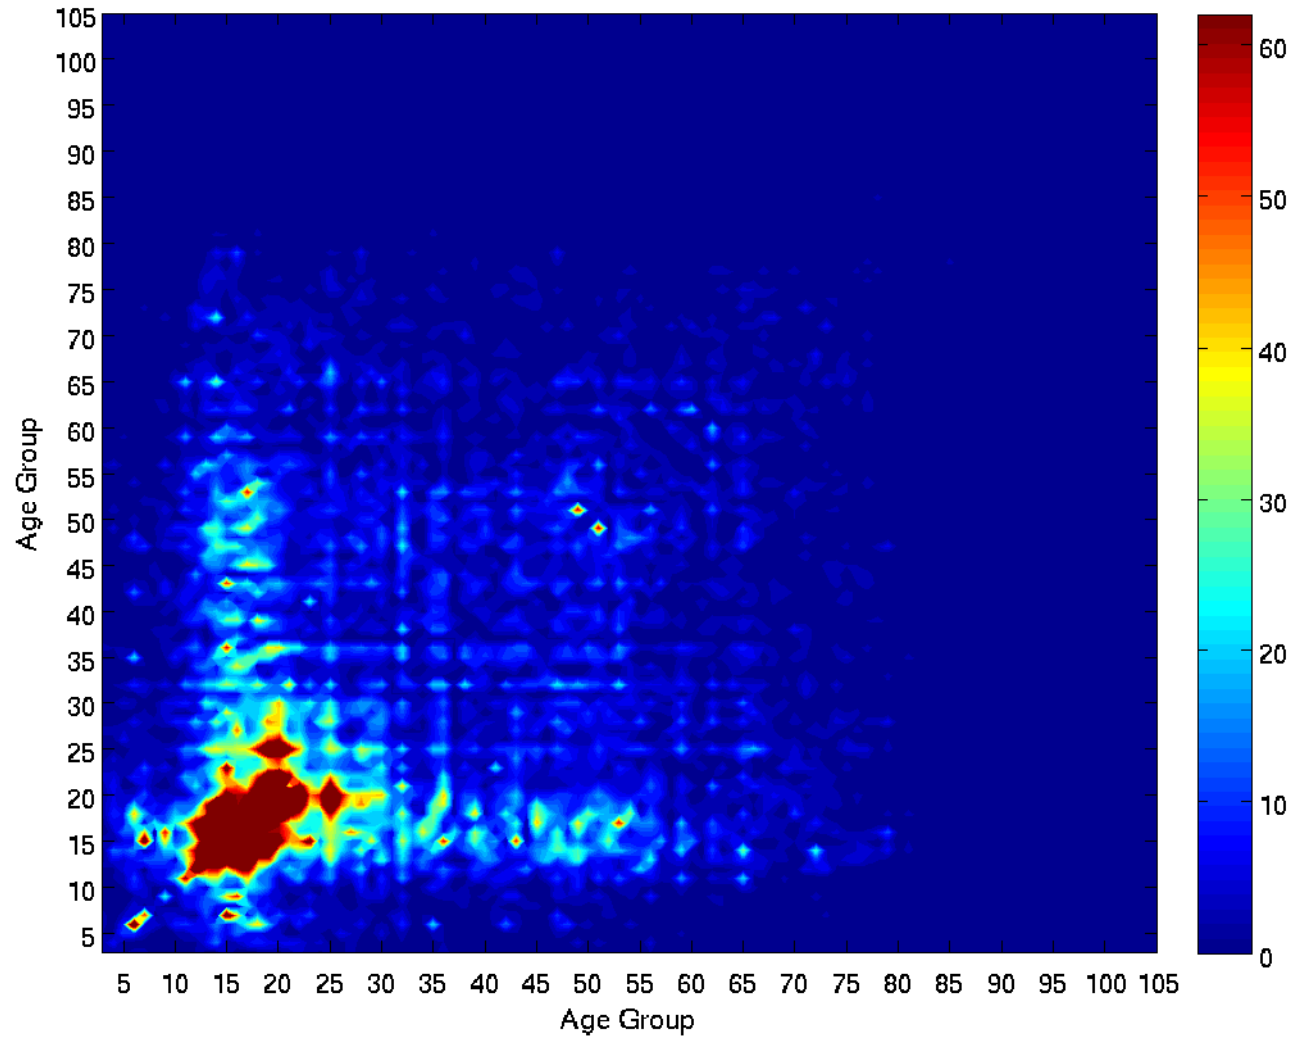

Supplement: pcbi.1001021.s004.pdf [file pcbi.1001021.s004.pdf]
