# Supplementary material for: Little Italy: An Agent-Based Approach to the Estimation of Contact Patterns- Fitting Predicted Matrices to Serological Data
Source: PLOS journal article supplement (doi:10.1371/journal.pcbi.1001021), 2010-12-02
Supplement: S3 (10.1371/journal.pcbi.1001021.s003) [file journal.pcbi.1001021.s003]

301 Moved Permanently

# Moved Permanently

The document has moved here.

---

Apache Server at www.ploscompbiol.org Port 80
